# Supplementary material
Source: PubMed Central journal article supplement (PMC10282706)
Supplement: media-4.pdf [file media-4.pdf]

## **Supporting Information for**

### **The Glucocorticoid Receptor is Required for Efficient Aldosterone-Induced Transcription by the Mineralocorticoid Receptor.**

Thomas A. Johnson, Gregory Fettweis, Kaustubh Wagh, Brian Almeida-Prieto, Manan Krishnamurthy, Arpita Upadhyaya, Gordon L. Hager, Diego Alvarez de la Rosa

Corresponding authors: GLH and DAdIR.

Email: [hagerg@dce41.nci.nih.gov](mailto:hagerg@dce41.nci.nih.gov); [dalrosa@ull.edu.es](mailto:dalrosa@ull.edu.es).

#### **This PDF file includes:**

Figures S1 and S2

#### **Other supporting materials for this manuscript include the following:**

Tables S1 to S3

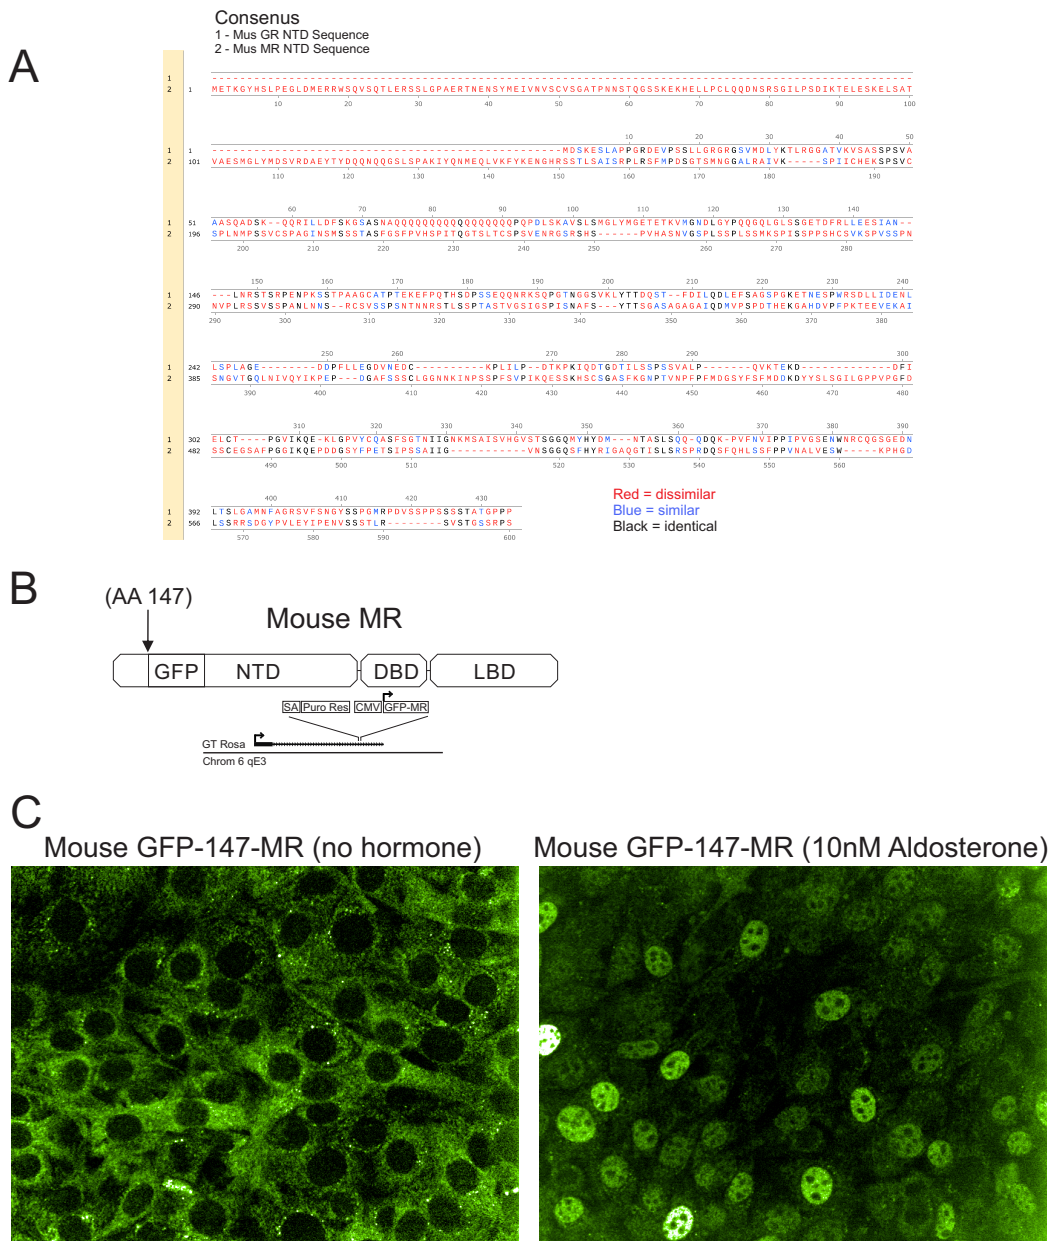

**Figure S1.** A. Sequence comparison between *M. musculus* MR and GR NTD. B. Schematic representation of *M. musculus* MR indicating the eGFP insertion site and the structure of the Donor-Rosa26\_Puro\_CMV-eGFP-MR vector. C. Representative confocal images showing eGFP-MR expression in a stable cell line and nuclear translocation after 1h 10 nM aldosterone treatment.

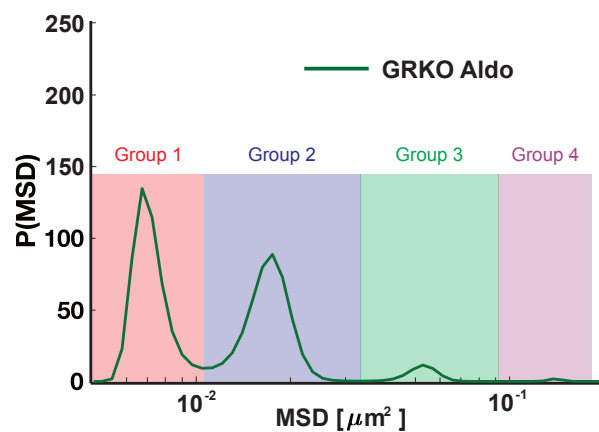

**Figure S2. Identification of different mobility groups from the MSD distribution.** A. representative mean squared displacement (MSD) distribution obtained by iteratively fitting the van Hove correlation function is shown. The local minima can be used to identify four distinct mobility groups.
